1  
2  
3  
4  
5  
6  
7  
8  
9  
10  
11  
12  
13  
14  
15  
16  
17  
18  
19  
20  
21  
22  
23  
24  
25  
26

**Epistatic networks jointly influence phenotypes related to metabolic disease and gene expression in Diversity Outbred mice**

Anna L. Tyler, Bo Ji, Daniel M. Gatti, Steven C. Munger, Gary A. Churchill, Karen L. Svenson, Gregory W. Carter\*

Anna.Tyler@jax.org  
Bo.Ji@jax.org  
Dan.Gatti@jax.org  
Steven.Munger@jax.org  
Gary.Churchill@jax.org  
Karen.Svenson@jax.org  
Gregory.Carter@jax.org

\*Corresponding author: Gregory W. Carter  
The Jackson Laboratory, 600 Main St, Bar Harbor, ME, USA

27

## 28 **Abstract**

29 Multiple genetic and environmental factors contribute to metabolic disease, with effects that range  
30 across molecular, organ, and whole-organism levels. Dissecting this multi-scale complexity requires  
31 systems genetics approaches to infer polygenic networks that influence gene expression, serum  
32 biomarkers, and physiological measures. In recent years, multi-parent model organism crosses, such  
33 as the Diversity Outbred (DO) mice, have emerged as a powerful platform for such systems  
34 approaches. The DO mice harbor extensive phenotypic and genetic diversity, allowing for detection  
35 of multiple quantitative trait loci (QTL) and their interactions at high genomic resolution. In this  
36 study, we used 474 DO mice to model genetic interactions influencing hepatic transcriptome  
37 expression and physiological traits related to metabolic disease. Body composition, serum  
38 biomarker, and liver transcriptome data from mice fed either a high-fat or standard chow diet were  
39 combined and simultaneously modeled. Modules of co-expressed transcripts were identified with  
40 weighted gene co-expression network analysis, with summary module phenotypes representing  
41 coordinated transcriptional programs linked to specific biological functions. We then used the  
42 Combined Analysis of Pleiotropy and Epistasis (CAPE) to simultaneously detect directed epistatic  
43 interactions between haplotype-specific QTL for transcript modules and physiological phenotypes.  
44 By combining information across multiple phenotypic levels, we identified networks of QTL with  
45 numerous interactions that reveal how genetic architecture affects metabolic traits at multiple scales.  
46 Specifically, these networks model how gene regulatory programs from different inbred founder  
47 strains influence more complex physiological traits. By connecting three levels of the organismal  
48 hierarchy – genetic variation, transcript abundance, and physiology – we revealed a detailed picture  
49 of genetic interactions influencing complex traits through differential gene expression.

## 50 **Introduction**

51 Traits relevant to metabolic disease, such as obesity, and blood lipid profiles, have complex genetic  
52 architecture (Schork 1997). Many genetic factors contribute to these traits and potentially interact to  
53 influence multiple traits simultaneously. Identifying these genes and their interactions will play a  
54 critical role in predicting individual susceptibility to metabolic disease and prioritizing drug targets  
55 for targeted treatments (Moore and Williams 2009). However, despite availability of large-scale  
56 genotype and phenotype data in multiple human populations, little is known about the genetic  
57 architecture of metabolic disease-related traits.

58

59 There are a number of challenges associated with mapping the genetic architecture of complex traits  
60 in human populations. In contrast to Mendelian traits, in which a single genetic variant is responsible  
61 for the vast majority of phenotypic variation, complex traits are influenced by many variants with  
62 small effects, which are difficult to detect. Large variation in environmental exposures between  
63 individuals can easily overwhelm small genetic effects, compounding the problem. Human  
64 populations, moreover, have intricate population structure (Rosenberg *et al.* 2002) which can cause  
65 spurious associations in genetic mapping experiments (Pritchard *et al.* 2000). Detecting genetic  
66 interactions, or epistasis, in humans raises additional challenges. Epistatic interactions tend to be  
67 weaker than main effects and can generate additive genetic variance (Huang and Mackay 2016), and  
68 variation in allele frequencies between populations makes replication of true interactions between  
69 populations difficult (Greene *et al.* 2009).

70

71 Highly diverse multi-parent populations, such as the Diversity Outbred (DO) mice (Svenson *et al.*  
72 2012) [Gatti] offer a powerful alternative to human populations for mapping the genetic  
73 architecture of complex traits. As an outbred population, the DO mice are potentially a better model  
74 of human populations than inbred mice. Because the DO founders included three strains recently  
75 derived from wild mice, the population contains extensive allelic variation that is evenly distributed

76 across the genome (Philip *et al.* 2011; Svenson *et al.* 2012; Logan *et al.* 2013). This density of  
77 polymorphisms allows much more extensive mapping than can be done in typical crosses between  
78 inbred strains, which can share large regions of identical sequence (Yang *et al.* 2011). Furthermore,  
79 the breeding paradigm in the DO is designed to maintain allelic diversity, reduce linkage  
80 disequilibrium, and generate minimal population structure (Svenson *et al.* 2012; Chesler *et al.* 2016).  
81 Thus variation in allele frequency does not confound detection of variant effects or epistasis as it  
82 does in human populations, and effects can be mapped to relatively narrow genomic loci, which will  
83 enhance the discovery of genetic influences on phenotype.

84  
85 A large number of traits, including many clinically relevant traits, have been measured in DO mice  
86 (Svenson *et al.* 2012; Bogue *et al.* 2015) [and @Gatti]. While heritable, few of these traits have a  
87 single QTL of exceptional effect [@Gatti]. The DO mice thus provide an ideal platform for  
88 investigating the genetic architecture of complex traits. Their phenotypic diversity combined with  
89 extensive genetic variation that is evenly distributed and highly recombined facilitates detection of  
90 both genetic main effects and interactions influencing many clinically relevant traits.

91  
92 In this study we use combined analysis of pleiotropy and epistasis (CAPE) {tyler2013cape} to  
93 investigate the genetic architecture of multiple complex traits related to metabolic disease in 474  
94 male and female DO mice fed either a high-fat or standard chow diet. Specifically, we analyzed  
95 epistasis influencing fat mass, lean mass, and circulating levels of cholesterol, triglycerides, and  
96 leptin, as well as three gene expression phenotypes. CAPE is an approach that combines information  
97 across multiple phenotypes to infer directed genetic interactions. It infers a single model for multiple  
98 quantitative traits, and leverages statistical power from multiple phenotypes to enhance the  
99 detection of QTL and their interactions. With this approach, we recently analyzed the genetic  
100 architecture of body composition and bone density in a well-powered F<sub>2</sub> mouse intercross (Tyler *et al.*  
101 *et al.* 2016) that revealed a large network of weak interactions that generally reduced phenotypic  
102 variation across the population. Here we apply the principles of this analysis to investigate the  
103 contributions of within-strain and between-strain epistatic interactions in the DO, augmented by  
104 interactive roles of sex and high-fat diet in the network.

## 105 **Results**

### 106 **Transcripts with *trans* genetic effects cluster into functionally enriched modules**

107 Because we were interested in genetic interactions that influence expression traits, which must  
108 include at least one *trans* effect, we first filtered the liver transcriptome to 3635 transcripts that were  
109 influenced by  
110 *trans* genetic loci (Methods). We performed weighted gene correlation network  
111 analysis (WGCNA) (Langfelder and Horvath 2008) on these transcripts and obtained 11 distinct  
112 modules. Using the Database for Annotation, Visualization and Integrated Discovery (DAVID) (Huang  
113 *et al.* 2009a; b) we found that three of these modules had significantly enriched functional  
114 annotations (Benjamini-adjusted  $p \leq 0.05$ ): (1) cellular metabolic process (Metabolism Module)( $p$   
115  $= 6.3 \times 10^{-17}$ ), (2) oxidation reduction process (Redox Module) ( $p = 7.7 \times 10^{-7}$ ), and (3) immune  
116 response (Immune Module)( $p = 5.2 \times 10^{-15}$ ) (Table 1). We used the module eigengenes from these  
117 modules as phenotypes for CAPE analysis (Methods) (Ghazalpour *et al.* 2006; Philip *et al.* 2014). We  
118 refer to them hereafter by their functional annotations.

### 120 **Pleiotropic QTL influence physiological and expression traits**

121 We combined the module eigengenes described above with five physiological traits: lean tissue mass,  
122 fat tissue mass, as well as cholesterol, leptin, and triglyceride levels. Fat mass was log-transformed to  
123 reproduce a more linear relationship with lean mass (Forbes 1987). These traits were modestly

124 correlated (Figure 1), implying that some genetic factors may be shared among the traits, while  
125 others may be distinct. To determine whether the traits here were influenced both by pleiotropic loci  
126 and loci specific to individual traits, we performed linear regression to associate the haplotype at  
127 each locus with each of our eight phenotypes (Methods). Across all traits, only one QTL for  
128 cholesterol on distal Chr 1 reached genome-wide significance (permutation-based  $p < 0.05$ ).  
129 However, there were multiple loci where individual haplotypes had substantial effects that  
130 potentially contribute to polygenic etiology (Figure 2). In some cases, a single haplotype had an  
131 apparent effect on a single phenotype. For example, a positive effect of the NZO haplotype on  
132 cholesterol can be seen on distal Chr 11 (Figure 2). Likewise, the A/J haplotype at a nearby locus had  
133 a positive effect on leptin levels (Figure 2). Other loci were pleiotropic. The CAST haplotype at a third  
134 locus on chromosome 11 had negative effects on fat mass, cholesterol, leptin, triglycerides, and the  
135 Immune Module (Figure 2). This effect was shared to a lesser extent by the PWK haplotype in fat  
136 mass, leptin, and triglyceride levels. This complex pattern of effects suggests a complex underlying  
137 genetic architecture. The haplotype effects that are common across multiple phenotypes may  
138 represent a common genetic factor influencing multiple traits. We combined these common signals to  
139 gain information about individual loci. Haplotypes that influence a single phenotype, for example the  
140 NZO haplotype effect on cholesterol, provide non-redundant information that can be used to identify  
141 genetic factors with specific phenotypic effects.  
142

### 143 **Singular value decomposition concentrates functional genetic effects**

144 We decomposed the trait matrix using singular value decomposition to obtain *eigentraits* (ETs)  
145 (Figure 3A). In our analysis we used the first three ETs, which captured 88.3% of the overall  
146 variance. ETs recombine covarying elements of the measured traits, and potentially concentrate  
147 functionally related effects. For example, leptin, cholesterol, and fat mass, along with the Redox and  
148 Immune Modules, were averaged in ET2. This ET appears to capture the CAST/PWK effect on Chr 11  
149 noted early to influence multiple traits. (Figure 3B).  
150

### 151 **An epistatic network involving all haplotypes influences physiological and expression traits**

152 Because there were more markers genotyped than could be tested exhaustively in pairs, we used a  
153 subset of haplotypes with the greatest effect-sizes in all three ETs (see Methods). The haplotype with  
154 greatest standardized effect from each potential QTL peak was retained and the peak was further  
155 sampled to keep 10% of markers within it. This process yielded a total of 515 markers representing  
156 all seven haplotypes on 17 chromosomes (The C57BL/6J haplotype was excluded because we used it  
157 as the reference strain). Because marker selection was based on effect size, the haplotypes were  
158 unevenly represented (Figure 5A). A/J was the most highly represented haplotype with 100 markers  
159 on eight chromosomes, and NOD was the least represented with 32. WSB alleles were the most  
160 widely distributed, being selected from 12 different chromosomes. We ran CAPE on these markers  
161 and the first three ETs to find an epistatic network between loci (Methods).  
162

163 The resulting network consisted of 89 interactions among 49 loci and two covariates (Figure 4). All  
164 haplotypes participated in at least one interaction (Figure 5A). WSB haplotypes were involved in the  
165 largest number of interactions (32), while NZO participated in the fewest (8). The number of total  
166 interactions each haplotype participated in did not correlate with its representation in the 515  
167 markers selected for the CAPE pipeline (Figure 5A) ( $p = 0.1$ ). The final epistatic network was  
168 directed, meaning that interactions model a source marker that acts on a target marker, and we can  
169 thus measure the number of times each haplotype was the source of an interaction or the target of an  
170 interaction. The majority of haplotypes were roughly evenly represented as both sources and targets.  
171 However, the 129 haplotype was a target of interactions about four times more frequently than it  
172 was a source, while the NZO haplotype was a source about twice as many times as it was a target

173 (Figure 5A). The covariates, sex and diet were both much more frequently sources of interactions  
174 than they were targets (Figure 5A).

175  
176 The interactions between haplotypes were most often between strains rather than within-strain  
177 (Figure 5B). Inter-strain interactions were concentrated among the 129, WSB, NZO and A/J  
178 haplotypes, which are all in the *Mus musculus domesticus* subspecies. CAST, *M. musculus castaneus*,  
179 interacted with each of the other strains relatively evenly, while PWK, *M. musculus musculus*, was the  
180 most isolated strain, and did not interact at all with the NZO or NOD haplotypes. The only haplotype  
181 with multiple intra-strain interactions was WSB. This may be due to the wide sampling of the  
182 selected WSB alleles from 12 different chromosomes resulting in more unique loci with potential for  
183 interacting with each other.

184

### 185 **Sex interacted with all founder haplotypes**

186 Sex significantly affected all physiological traits except leptin levels. This effect was positive for all  
187 phenotypes meaning that males had higher log fat mass (males 1.9 g, females: 1.7 g,  $p = 5.7 \times 10^{-2}$ ),  
188 lean mass (males: 25.1 g, females: 18.3 g,  $p < 2 \times 10^{-16}$ ), cholesterol (males 110.4 mg/dl, females: 93.8  
189 mg/dl,  $p = 4.3 \times 10^{-10}$ ), and triglycerides (males: 156.0 mg/dl, females: 115.0 mg/dl,  $p = 7.6 \times 10^{-14}$ ). All  
190 expression modules were significantly lower in males (all  $p < 2 \times 10^{-16}$ ). Sex also participated in  
191 interactions with genetic loci. The majority of genetic interactions with sex (12 of 15) involved a  
192 suppression of allele effects by sex, indicating that the alleles had larger effects in females than in  
193 males. Alleles from all founder strains were affected. One locus, the CAST allele on Chr 11, enhanced  
194 the effects of sex. The allele overall had negative effects on leptin, cholesterol, and lean mass, but in  
195 males, these measures were higher in the presence of this allele than expected from the additive  
196 model. There was also a single locus, the WSB allele on Chr 17, that suppressed the effects of sex,  
197 indicating that males carrying this allele had lower than expected lean mass, fat mass, etc. For  
198 example, both this allele and sex had positive effects on cholesterol, but cholesterol levels in male  
199 mice carrying this WSB allele were lower than expected from the additive model. Finally, phenotypic  
200 effects of the male sex were enhanced by the high-fat diet, suggesting that males were more  
201 susceptible to the effects of the high-fat diet.

202

### 203 **Diet interacted with a subset of parental haplotypes**

204 Diet significantly increased log fat mass (chow: 1.6 g, HF: 2.1 g,  $p < 2 \times 10^{-16}$ ), cholesterol (chow: 85.8  
205 mg/dl, HF: 119.1 mg/dl,  $p < 2 \times 10^{-16}$ ), and leptin (chow: 7.7 mg/dl, HF: 19.7 mg/dl,  $p < 2 \times 10^{-16}$ ) and  
206 significantly decreased triglyceride levels (chow: 146.7 mg/dl, HF: 124.3 mg/dl,  $p = 1 \times 10^{-4}$ ). It also  
207 significantly decreased all expression modules (all  $p < 0.001$ ). Similar to sex, the majority of genetic  
208 interactions with diet (five of seven) were those in which high-fat diet suppressed genetic effects.  
209 That is, the alleles had greater phenotypic effect in chow-fed mice than mice on the high-fat diet.  
210 There was one locus, the CAST allele on Chr 2, that enhanced the effects of diet, indicating that  
211 animals carrying this allele were more susceptible to the effects of the high-fat diet. The effects of diet  
212 were also enhanced by sex, as mentioned above, indicating that males in this population were more  
213 susceptible to the effects of the high-fat diet than females.

214

### 215 **Network motifs had both redundant and synergistic effects on phenotypes**

216 To better understand the overall influence of genetic interactions on traits, we performed a network  
217 motif analysis as described in (Tyler *et al.* 2016). Network motifs are composed of one interaction  
218 between two loci, each of which has a main effect on one phenotype (Figure 6A). The interaction can  
219 either be suppressing or enhancing, and the two main effects can drive the phenotype either in the  
220 same direction (coherent) or in opposing directions (incoherent). Here we investigated the effects of

221 network motifs on traits in the DO and compare our results to our previous results from results from  
222 an F<sub>2</sub> intercross between inbred strains in Tyler et al. (2016) (Tyler *et al.* 2016).

223  
224 Only enhancing-incoherent and suppressing-coherent motifs were present in the DO epistatic  
225 network (Figure 6B). They involved all parental haplotypes and were predominantly interactions  
226 between haplotypes from different parents (enhancing-incoherent: 72% different parental  
227 haplotypes, suppressing-coherent: 96% different parental haplotypes). In contrast to the intercross,  
228 the enhancing-incoherent motifs were not predominantly balancing, but tended to drive traits away  
229 from the population mean. The vast majority of these motifs (92%) had a destabilizing effect on  
230 phenotype, and 80% drove the phenotype past any additive prediction (Figure 7). A substantial  
231 fraction of the suppressing-coherent motifs (25%) were non-redundant, meaning they pushed  
232 phenotypes farther from the population mean than predicted by the additive model (Figure 7).

## 233 Discussion

234 Traits associated with metabolic disease, such as cholesterol levels, body fat mass, and triglyceride  
235 levels have complex genetic architecture. Mapping genes influencing these traits will help identify  
236 mechanistic factors influencing them and, together with molecular biomarkers, may ultimately  
237 provide targets for therapies. Mapping complex genetic effects, however, is challenging, especially in  
238 human populations in which environmental factors and population structure can overwhelm weak  
239 genetic effects. Mice offer an excellent alternative as pre-clinical model organisms in which to dissect  
240 complex traits mechanistically. However, the majority of inbred strains used in medical research are  
241 closely related to each other. They have limited phenotypic diversity and large genetic blind spots due  
242 to a lack of genetic variants between them. The DO mice provide a powerful alternative platform for  
243 fine-mapping complex traits. They harbor immense genetic and phenotypic diversity, and have  
244 minimal population structure, thereby allowing much more detailed assessments of complex genetic  
245 architecture influencing complex traits. The genetic diversity in the DO does create its own issues,  
246 however, in that large genetic effects can be difficult to find. Using standard mapping methods, we  
247 and others have shown that most traits are influenced by many QTL with small effects (@gatti), and  
248 few QTL rise to genome-wide significance. Here we used Combined Analysis of Pleiotropy and  
249 Epistasis (CAPE) to combine multi-dimensional phenotype information and test for genetic  
250 interactions influencing a suite of related traits. We found numerous individual effects and an  
251 epistatic interaction network influencing both physiological and expression traits. The interaction  
252 effects, which tended to be weak, identified genetic elements that potentially influence the traits and  
253 informed on the general genetic architecture of these traits.

254  
255 The two factors with the largest influence on most phenotypes were sex and diet. Sex influenced all  
256 traits except serum leptin levels. In our network, sex also interacted with 14 genetic loci. Although  
257 multiple sex-specific QTL have been mapped in humans (Weiss *et al.* 2006; Ober *et al.* 2008), the  
258 studies are often of low power and few individual results have been replicated (Ober *et al.* 2008). The  
259 DO mice offer a powerful platform to investigate the role of sex in complex traits in mammalian  
260 systems. In our study, the majority of the genetic interactions with sex were a suppression of allele  
261 effects in males. These alleles may help identify important risk and protective alleles for metabolic  
262 disease in females. For example, the 129 allele at a locus on Chr 19 had positive effects on the  
263 Metabolism Expression Module and triglyceride levels, suggesting that this locus contains a gene that  
264 increases triglycerides through gene expression differences in metabolic pathways. The effects of the  
265 129 allele were suppressed by sex, indicating that it had a larger effect in females than males.  
266 Combining the allele and interaction information from the CAPE network, we can generate a  
267 hypothesis about the causal gene in this locus. There are six genes known to influence triglycerides in  
268 the Chr 19.4 locus and one of these, *Sorbs1*, has a *cis* 129-specific effect increasing *Sorbs1* expression

269 (Figure 8A). *Sorbs1* is furthermore expressed more highly in females ( $p = 0.002$ ) (Figure 8B), and is  
270 significantly correlated with triglyceride levels in the DO mice ( $r^2 = 0.17$ ,  $p < 2 \times 10^{-16}$ ). Previous work  
271 has shown that mice with homozygous deletions of this gene have reduced triglyceride levels  
272 (Lesniewski *et al.* 2007). Increased expression due to the gain-of-function 129 allele is consistent  
273 with increased triglycerides in carriers, and therefore the 129 allele of this gene may increase risk for  
274 elevated triglyceride levels in female mice.

275  
276 In addition to sex, diet is an important factor in determining risk of metabolic disease and their  
277 related phenotypes. The high-fat diet in our study had a substantial impact on all traits except the  
278 Metabolism Module. High-fat diet enhanced the effects of sex indicating that males in the DO  
279 population were more susceptible to the effects of the diet than females. It has been shown that  
280 inbred male B6 mice gain more weight and have higher blood lipid profiles when given a high-fat diet  
281 (Hwang *et al.* 2010). And although not represented in the DO, male BALB/cA mice have also been  
282 shown to be more susceptible than females to weight gain and hepatic lipid accumulation (Nishikawa  
283 *et al.* 2007). Diet interacted with a number of genetic loci, and like sex, mostly suppressed the effects  
284 of these loci, indicating that the alleles had a larger effect in animals fed standard chow. Multiple  
285 studies have shown interactions between genes and diet in influencing factors related to traits  
286 associated with metabolic disease (for review see (Ordovas 2006)). The resolution in the DO genome  
287 combined with information about genetic interactions will help speed identification of genes  
288 interacting with diet and help elucidate how high-fat, high-sucrose diets lead to obesity and  
289 metabolic disease, as well as how healthy diets help prevent these conditions.

290  
291 In addition to the interactions with sex and diet, genetic loci also interacted with each other to  
292 influence phenotypes in network motifs. In a previous study of an F<sub>2</sub> intercross (Tyler *et al.* 2016), we  
293 found that suppressing-coherent and enhancing-incoherent motifs were significantly enriched in the  
294 epistatic network. In this F<sub>2</sub> population, both types of motifs tended to have moderating effects on  
295 phenotypes.

296 The suppressing-coherent network motifs tended to reflect redundancy, while the enhancing-  
297 incoherent interactions had a balancing phenotypic effect driving phenotypes toward inbred strain  
298 means (Tyler *et al.* 2016). Animals homozygous for one parental allele at both interacting loci had  
299 less extreme phenotypes than those with a mix of parental alleles at the two loci (Tyler *et al.* 2016).  
300 Similar to our previous findings, network motifs in the DO were predominantly enhancing-  
301 incoherent or suppressing-coherent (Figure 6B). However, in contrast to the intercross, the  
302 enhancing-incoherent motifs frequently drove traits farther from the population mean than  
303 predicted by the additive model. The majority of the suppressing-coherent motifs had redundant  
304 effects, *i.e.* the two loci had less than additive effects, but a substantial fraction (36%) also  
305 destabilized phenotypes, driving them away from the population mean.

306  
307 This phenotypic destabilization is likely due to the difference in allelic combinations between the  
308 multi-parent DO mice and a classic intercross design. In an intercross all interactions by definition  
309 are between alleles from a single non-reference parent, whereas interactions in the DO were most  
310 frequently between alleles from different parental ancestries. In both designs, each of the parental  
311 strains has developed its own unique set of alleles to maintain quantitative traits at strain  
312 homeostasis. In an intercross, accumulation of alleles from a single parental strain may  
313 combinatorially achieve homeostatic phenotypes for that parent. By contrast, in the DO the mixing of  
314 parental alleles may instead destabilize phenotypes by driving them to extremes and creating the  
315 immense phenotypic diversity seen in this population. Furthermore, that we see more destabilizing  
316 interactions among the enhancing-incoherent motifs may imply something about molecular pathway  
317 structure. We hypothesize that suppressing-coherent motifs represent interactions between genes  
318 within a single pathway, while enhancing-incoherent motifs represent interactions between genes in  
319 different, but functionally related pathways. This is consistent with earlier work on perturbations of

320 fruit fly signaling pathways (Horn *et al.* 2011; Carter 2013). The patterns of stabilizing and  
321 destabilizing motifs in our study suggests that recombining parental alleles within pathways is well  
322 tolerated and often redundant, while recombination between related pathways more frequently  
323 destabilizes phenotypes.

324  
325 Although the genetic diversity in the DO allows relatively fine mapping, we cannot definitively  
326 identify which genes in these loci are responsible for the phenotypic effects. We can, however,  
327 combine the information in epistatic interactions with estimated functional interactions to generate  
328 hypotheses about causal genes. For example, we found an interaction between the A/J haplotype on  
329 Chr 9 locus 2 (Chr 9.2: 5 Mb to 36 Mb) and the CAST haplotype on Chr 2 locus 2 (Chr2.2: 123 Mb to  
330 133 Mb) that influenced the Immune Module. Each locus had a negative main effect on the Immune  
331 Module, and their combined effect was redundant with the effect of the Chr 2.2 locus (Figure 9A).  
332 This pattern of effects indicates a redundant interaction and the possibility that the causal genes on  
333 the two loci operate in the same pathway. To further investigate this premise, we identified all the  
334 genes in the two regions that had strain-specific polymorphisms (A/J on Chr 9.2 and CAST on Chr  
335 2.2), and filtered these to include genes that had been previously annotated to the mammalian  
336 phenotype (MP) term “immune phenotype” (see Methods). We then used Integrative Multi-species  
337 Prediction (IMP) (Wong *et al.* 2015) to identify the most likely among these genes to interact  
338 functionally. This filtering process identified *Casp4* on Chr 9.2 and *Il1b* on Chr 2.2 as the most likely  
339 genes in these two loci to interact. In the IMP network, the two genes interacted directly in a network  
340 functionally enriched for cytokine production and secretion ( $p = 4.3 \times 10^{-12}$ ) (Motenko *et al.* 2015)  
341 (Figure 9B). In support of the hypothesis that *Casp4* and *Il1b* interact, both transcripts are correlated  
342 with the Immune Module (Figure 9C, *Casp4*:  $r^2 = 0.48$ ,  $p = 2.6 \times 10^{-28}$ , *Il1b*:  $r^2 = 0.49$ ,  $p = 1 \times 10^{-30}$ ), and  
343 with each other ( $r^2 = 0.32$ ,  $p = 7.4 \times 10^{-13}$ ) (Figure 8C). *Casp4*, also known as *Casp-11*, is a member of  
344 the cysteine-aspartic acid protease family and is essential for IL1B secretion. Mice with homozygous  
345 mutations of *Casp4* have decreased levels of circulating IL1B (Wang *et al.* 1998). That *Casp4* is  
346 directly involved in IL1B secretion is consistent with the redundant genetic interaction we observed  
347 between Chr 9.2 and Chr 2.2 in the CAPE network. Redundant interactions are hypothesized to occur  
348 between variants encoding genes within a single pathway (Avery and Wasserman 1992; Lehner  
349 2011). Each variant has a similar effect on the pathway, but because the pathway can only be  
350 disrupted once, the combination of the two variants did not have a further effect despite being from  
351 different parental strains. Such combinatorial, polygenic candidate genes were revealed by our  
352 genetic interaction analysis that identified redundant genetic effects.

353  
354 Elsewhere in the network, we hypothesize that genes interacting in enhancing-incoherent network  
355 motifs function in distinct pathways that nevertheless influence each other. In addition to the  
356 redundant interaction above, we prioritized interacting genes in a second interaction between the  
357 same A/J haplotype on Chr 9.2 another QTL on Chr 2. This second locus, Chr 2 locus 4 (Chr2.4: 165  
358 Mb to 171 Mb) represented an effect of the NOD haplotype and did not overlap the CAST QTL (123  
359 Mb to 133 Mb) that also interacted with the Chr 9.2 A/J QTL. This QTL thus represents a distinct  
360 interaction. The A/J Chr 9.2 and the NOD Chr 2.4 loci influenced the Immune Expression Module in  
361 opposite directions, and together, they drove the trait to be slightly more negative than predicted by  
362 the additive model (Figure 10A). Following the same gene selection pipeline described above, we  
363 identified *Casp4* again for the Chr 9.2 A/J locus, and *Src* as a likely interacting partner in the Chr 2.4  
364 NOD locus (Figure 10B). Transcripts for both genes are significantly correlated with the immune  
365 expression module (*Casp4*:  $r = 0.47$ ,  $p = 6.3 \times 10^{-28}$ ; *Src*:  $r = 0.47$ ,  $p = 3.7 \times 10^{-27}$ ) and with each other ( $r =$   
366  $0.21$ ,  $p = 3.2 \times 10^{-6}$ ) (Figure 10C). In the IMP network *Casp4* and *Src* occupy two lobes of a connected  
367 graph, indicating that they are less directly functionally related than *Casp4* and *Il1b*. The *Casp4* side of  
368 the network is enriched for genes involved in inflammasome pathways ( $p = 2.9 \times 10^{-6}$ ) (Motenko *et al.*  
369 2015), while the *Src* side of the network is enriched for EGFR signaling ( $p = 2.7 \times 10^{-4}$ ) (Motenko *et al.*  
370 2015). The IL-1 and EGF families of proteins are upregulated in human keratinocytes during wound



371 healing and in psoriasis, and they have been shown to interact synergistically in upregulating  
372 transcripts involved in antimicrobial defenses (Johnston *et al.* 2011). Conversely, inhibiting EGFR  
373 signaling in keratinocytes reduces their IL-1 secretion in response to *Staphylococcus aureus* infection  
374 (Simanski *et al.* 2016). In sum, these observations suggest that the A/J allele of *Casp4* and the NOD  
375 allele of *Src* may interact to influence immune-related expression in mice.

376  
377 Our analysis of genetic interactions in DO mice has revealed a number of interesting features of the  
378 genetic architecture of complex traits related to metabolic disease. First, we detected numerous  
379 significant genetic interactions influencing both physiological and expression traits in an outbred  
380 population. Although these effects were small relative to the main effects we identified, we were able  
381 to detect them by combining information across multiple phenotypes. The interactions primarily  
382 involved alleles from different parental haplotypes. This pattern indicates that multi-parent  
383 populations may be more powerful platforms than standard intercrosses for detecting epistasis due  
384 to the increased genetic diversity. Interactions in an intercross are by definition between alleles from  
385 the same parental strain, but in the DO interactions within strain haplotypes are relatively rare. With  
386 the additional allelic variation in the DO, more genetic combinations with diverse phenotypic effects  
387 are present. Second, we found that network structure of genetic interactions in outbred mice is  
388 distinct from the network structure we found previously in a mouse intercross. In the intercross  
389 interactions described by network motifs predominantly reduce variation in traits, driving them  
390 toward the parental strain mean. In contrast, the enhancing-incoherent motifs in the outbred mice  
391 tended to drive traits away from the population mean. The extreme traits were most frequently  
392 caused by interactions between allele from different parental haplotypes. Extreme phenotypes upon  
393 recombination of alleles in the DO may have the benefit of making epistasis in outbred populations  
394 easier to detect than epistasis in intercrosses between two inbred strains. Finally, we showed that we  
395 can use genetic interactions as information to prioritize candidate genes in genomic regions.  
396 Interactions between two loci imply a functional relationship between elements encoded in the two  
397 loci. By combining information about haplotype-specific genetic interactions with genomic functional  
398 data, like the IMP network, we can generate plausible hypotheses regarding causal genes. The  
399 hypotheses generated by this method in this study were supported by expression data not used in  
400 the hypothesis generation. Together these results speak to the value of multi-parent outbred  
401 populations in the dissection of the genetic architecture of clinically relevant complex traits.

## 402 **Methods**

### 403 **Mice**

404 Mice were obtained from The Jackson Laboratory (Bar Harbor, ME) as described in (Svenson *et al.*  
405 2012) and @Gatti. The animals were non-sibling DO mice ranging from generation 4 to 11, and males  
406 and females were represented equally. All animal procedures were approved by the Animal Care and  
407 Use Committee at The Jackson Laboratory (Animal Use Summary # 06006). Mice were housed in  
408 same-sex cages with five animals per cage as described in (Svenson *et al.* 2012) and @Gatti. Animals  
409 had free access to either standard rodent chow (6% fat by weight, LabDiet 5K52, LabDiet, Scott  
410 Distributing, Hudson, NH) or a high-fat, high-sucrose diet (HFD) (Envigo Teklad TD.08811, Envigo,  
411 Madison, WI) for the duration of the study protocol (26 weeks). Caloric content of the HFD was 45%  
412 fat, 40% carbohydrates and 15% protein. Diets were assigned randomly.

### 413 **Phenotype Measurements**

414 Phenotypes were measured as described in (Svenson *et al.* 2012) and @Gatti. Beginning at eight  
415 weeks of age, blood was collected retro-orbitally after administration of local anesthetic. Cholesterol  
416 and triglycerides were measured using the Beckman Synchron DXC600Pro Clinical chemistry  
417 analyzer. Leptin was measured in non-fasted plasma prepared as previously described (Svenson *et*  
418 *al.* 2012). Levels were analyzed using the Meso Scale Discovery electrochemiluminescent system

419 according to the manufacturer's recommended protocol (Meso Scale Diagnostics, Rockville, MD).  
420 Body composition (lean mass and total mass) were measured at age 12 weeks using dual X-ray  
421 absorptiometry (DEXA) using a Lunar PIXImus densitometer (GE Medical Systems). Fat mass was  
422 calculated as  $\log(\text{total mass} - \text{lean mass})$ . Measurements were performed at two time points. All  
423 measurements in this study were taken from the first time point.

#### 424 **Genetic analysis**

425 Genotyping was performed on tail biopsies as described in (Svenson *et al.* 2012) using the Mouse  
426 Universal Genotyping Array (MUGA). A subset of the animals (293) were genotyped on the  
427 Megamuga (GeneSeek, Lincoln, NE). The intensities from the arrays were used to infer the haplotype  
428 blocks in each DO genome using a hidden Markov model (HMM) (Gatti *et al.* 2014b).

429

#### 430 **Merging Haplotype Reconstructions from Different Methods**

431 Genotypes were measured with the MUGA (7,854 markers), Megamuga (77,642 markers) and by  
432 GBRS, which is a set of software tools that uses RNA-Seq data to reconstruct individual sample  
433 genomes in multiparental population (MPP) (@Gatti, and [http://https://github.com/churchill-](http://https://github.com/churchill-lab/gbrs)  
434 [lab/gbrs](http://https://github.com/churchill-lab/gbrs)). To merge diplotype probabilities from all sources, we interpolated markers on an evenly  
435 spaced 64,000 marker grid (0.0238 cM between markers).

436

#### 437 **Transcriptome profiling**

438 Transcriptome-wide expression levels were measured as described in (Chick *et al.* 2016), (Munger *et al.*  
439 *et al.* 2014) and @Gatti. Total liver RNA was isolated from each mouse and sequenced using single-end  
440 RNA-Seq (Munger *et al.* 2014). Transcripts were aligned to strain-specific genomes from the DO  
441 founders (Chick *et al.* 2016). We used an expectation maximization algorithm (EMASE,  
442 <https://github.com/churchill-lab/emase>) to estimate read counts. Read counts in each sample were  
443 normalized using upper-quantile normalization and a rank Z transformation was applied across  
444 samples.

#### 445 **Filtering transcripts for *trans* effects**

446 We were interested in mapping effects to transcripts that were influenced by distant (*trans*) genetic  
447 loci. To determine which transcripts had *trans* loci, we first used DOQTL (Gatti *et al.* 2014a) to map  
448 QTL for all transcripts expressed in at least 50 samples (26,875 transcripts). DOQTL effects using  
449 founder allele haplotype probabilities calculated as described in (Gatti *et al.* 2014b). In addition, we  
450 used sex, diet and batch as additive covariates and used hierarchical linear models to correct for  
451 genetic relatedness (Kang *et al.* 2008).

452

453 From this mapping we identified *cis*-eQTLs for transcripts, which we defined as a suggestive eQTL  
454 (LOD  $\geq 7.4$ ) within 2 Mbp of the encoding gene's transcription start site. For each transcript, we  
455 regressed out the effects of the *cis*-eQTL (Pierce *et al.* 2014) and re-mapped QTL using DOQTL. We  
456 identified 3635 *trans*-eQTLs defined as a QTL (LOD  $\geq 7.4$ ) on a chromosome other than the  
457 transcripts encoding gene or at least 10 Mb away on the same chromosome. Additionally, for the  
458 following clustering analysis, we used the residual expression by removing the effects of *cis*-  
459 *haplotype* and batch effect via linear regression. The procedure is outlined in Supplementary Figure  
460 1.

461

#### 462 **Weighted Gene Co-expression Network Analysis**

463 Co-expression gene modules were obtained by clustering *trans*-acting transcripts using the WGCNA  
464 package in R (Langfelder and Horvath 2008; undefined author 2016). WGCNA computes the absolute  
465 value of Pearson correlation for all gene pairs and generates an adjacency matrix by raising the

466 correlation matrix to a user-defined power. We set the power to six to achieve a network with scale-  
467 free degree distribution. To construct the module network, WGCNA uses hierarchical clustering to  
468 produce a dendrogram of genes. Individual branches of the dendrogram represent modules, which  
469 are clusters of highly co-expressed genes. The modules with similar expression profiles can be  
470 merged based on their correlation. We set the minimum module size to 30 and the minimum height  
471 for merging to 0.25 (corresponding to a Pearson correlation of 0.75) to obtain relatively large and  
472 distinct modules. The first principal component for each module (termed *eigengenes* in WGCNA) is  
473 used to represent the summary co-expression pattern for each module. These eigengenes are  
474 hereafter referred to as *module phenotypes* for CAPE analysis. Each module was assessed for  
475 functional enrichment using the DAVID database (Huang *et al.* 2009a; b). The GO enrichment  
476 significance threshold for all gene ontology enrichment analyses was  $p \leq 0.05$ , with Benjamini  
477 correction for multiple comparisons.

478

### 479 **Combined analysis of pleiotropy and epistasis**

480 Combined analysis of pleiotropy and epistasis (CAPE) is a method for deriving genetic interaction  
481 networks of genetic variants that influence multiple phenotypes {tyler2013cape}. The open-source R  
482 package of cape was adapted (below) to use for DO mice with extension to multiple alleles in our  
483 analysis.

484

485 We began our analysis by regressing outbreeding generation out of each trait and applying a rank Z  
486 transformation to each physiological trait. These were combined with the three module eigengenes  
487 representing significantly enriched modules from WGCNA (see above). We then performed singular  
488 value decomposition (SVD) on the trait matrix to obtain eight orthogonal eigentraits (ET's). The ET's  
489 combine common signals across all traits. In this analysis, we used the first three ETs, which captured  
490 88.3% of the variation in the traits. We then performed linear regression to associate each marker  
491 with each ET.

492

493 For each marker we used a seven-state model to estimate the effect of the founder haplotypes on  
494 each trait. We use the B6 allele as the reference, and thus B6 alleles are not explicitly included in our  
495 final results. We also included two covariates, sex (female: 0, male: 1) and diet (chow: 0, high-fat: 1).

$$E_i^j = \beta_0^j + \underbrace{\sum_{c=1}^2 x_{c,i} \beta_c^j}_{\text{covariates}} + \underbrace{\sum_{a=1}^7 P_{i,a} \beta_a^j}_{\text{allele effects}} + \epsilon_i^j$$

496

497 The index  $i$  is from 1 to number of samples and  $j$  is from 1 to number of ET's.

498  $P_{i,a}$  is the probability of each allele  $a$  at the locus, and  $x_{c,i}$  is the presence or absence of each covariate.

499 We used the results of the single-locus regression to select markers for the locus-pair regressions.

500

### 501 **Variant selection for pairwise regression**

502 Because there were more markers genotyped than could be tested in a pairwise regression, we  
503 selected a subset of variants based on standardized effect size. We selected individual haplotypes (for  
504 example the A/J haplotype at marker 1) such that haplotypes from multiple founder strains and  
505 multiple chromosomes would be represented in the locus-pair regression. To do this, we picked an  
506 arbitrary threshold and identified haplotype peaks in effect size that rose above this threshold. We  
507 picked the marker with the largest effect size in this peak and sampled 10% of the remaining  
508 markers in the peak uniformly at random. We progressively lowered the threshold until we had  
509 sampled approximately 500 individual variants. (Supplementary Table 2) The final number of  
510 variants selected was 515, representing all haplotypes across 17 chromosomes.

511

### 512 **Pairwise regression**

513 We express the full model for two variants labeled 1 and 2 as:

$$E_i^j = \beta_0^j + \underbrace{\sum_{c=1}^2 x_{c,i} \beta_c^j}_{\text{covariates}} + \underbrace{P_{1,i} \beta_1^j + P_{2,i} \beta_2^j}_{\text{main effects}} + \underbrace{P_{1,i} P_{2,i} \beta_{12}^j}_{\text{interaction}} + \epsilon_i^j$$

514  
515

516 The index  $i$  is from 1 to number of samples and  $j$  is from 1 to number of ET's.

517  $P_{i,a}$  is the probability of each allele  $a$  at the locus, and  $x_{c,i}$  is the presence or absence of each covariate.

518  $E_{ij}$  is the ET for sample  $i$ .  $P_{1,i}$  and  $P_{2,i}$  are the probabilities of the allele at each of two variants for  
519 sample  $i$ .  $P_{1,i} P_{2,i}$  is the interaction of two variants,  $\beta_1$  and  $\beta_2$  are the effects of two variants on the ET  $j$ ,  
520 and  $\beta_{12}$  is the interaction coefficient.

521

522 For each marker pair, the regression coefficients across all ET's were reparametrized to obtain two  
523 new parameters ( $\delta_1$  and  $\delta_2$ ). The  $\delta$  terms are independent of phenotype and can be defined as the  
524 degree to which one variant influences the effect of the other on the phenotypes.  $\delta_1$  represents the  
525 inferred genetic activity of the first variant when the second variant is present. A negative  $\delta$   
526 coefficient indicates one variant suppressing another. For example, a negative  $\delta_1$  indicates that  
527 variant 1 suppresses the effect of variant 2 on that phenotype. The  $\delta$  terms are computed in terms of  
528 coefficients from pairwise regression as follows:

529

$$\begin{bmatrix} \delta_1 \\ \delta_2 \end{bmatrix} = \begin{bmatrix} \beta_1^1 & \beta_2^1 \\ \beta_1^2 & \beta_2^2 \\ \vdots & \vdots \end{bmatrix}^{-1} \cdot \begin{bmatrix} \beta_{12}^1 \\ \beta_{12}^2 \\ \vdots \end{bmatrix}$$

530

531 Next, the  $\delta$  terms are translated into directed variables  $m_{12}$  and  $m_{21}$ , which describe variant-to-  
532 variant influences that fit all phenotypes via indirect associations. The term  $m_{12}$  and  $m_{21}$  are direct  
533 influences of one variant on the other, with negative influences indicating suppression and positive  
534 influences indicating enhancement. The terms  $m_{12}$  and  $m_{21}$  are defined in terms of  $\delta_1$  and  $\delta_2$ :

$$535 \quad m_{12} = \frac{\delta_1}{1+\delta_2}, m_{21} = \frac{\delta_2}{1+\delta_1}$$

536 Errors are estimated through standard least-squares regression and a second-order Taylor  
537 expansion on the regression parameters (Carter *et al.* 2012). We defined the absolute value of the  
538 ratio of an estimated coefficient and its standard error ( $|\beta/se|$ ) as the standardized effect to evaluate  
539 the main effects of the variants on the phenotypes and the interactive effects of the variants. The  
540 significance threshold of the standardized effect is determined based on genotype permutation test  
541 and adjusted for multiple testing. To avoid false positives due to linkage disequilibrium (LD), we  
542 excluded variant pairs with Pearson's correlation coefficient above 0.5 in the pairwise regression.

543

## 544 Permutation testing

545 Permutation testing was conducted to generate null distributions of  $m$  parameters. For each  
546 permutation, we shuffled the ETs relative to genotypes. We then performed a single locus scan and  
547 selected the top ~500 markers for a pairwise marker scan as described above. We repeated this  
548 process until 500,000 marker pairs were tested. We combined permutations across marker pairs to  
549 generate a single null distribution (Tyler *et al.* 2014). Empirical p values for each model parameter  
550 were calculated and corrected using false discovery rate (FDR) {benjamini1995controlling}.

551

## 552 **Grouping linked markers**

553 Final results are reported for linkage blocks rather than individual markers. The blocks were  
554 determined as described in (Tyler *et al.* 2016). Briefly, for each haplotype, we used the correlation  
555 matrix between variants as an adjacency matrix to construct a weighted network, and used the fast  
556 greedy community detection algorithm in R/igraph to estimate boundaries between blocks of similar  
557 markers (Csardi and Nepusz 2006).

## 559 **Phenotypic Effects of Motifs**

560 For each motif in the epistatic network, we examined the phenotypic effects of each of the individual  
561 loci as well as the interaction effect. For each individual locus, we divided the animals into two bins:  
562 those carrying the alternate allele (e.g. at least heterozygous for the A/J allele at locus 1), and all  
563 others. We calculated the mean trait value across all traits for both groups, and defined the main  
564 effect of the allele as the difference between the groups. The predicted additive effect was the sum of  
565 the two main effects. To calculate the actual effect of the interaction, we binned the animals into two  
566 groups: those carrying the alternate allele at both loci (e.g. at least heterozygous for the A/J allele at  
567 locus 1 *and* at least heterozygous for the NOD allele at locus 2), and all others.

## 568 **Prioritization of genes in interacting loci**

569 We used a function-oriented method to generate hypotheses about which genes in interacting  
570 regions might be contributing to the epistatic effects inferred by CAPE. We focused on two  
571 interactions that influenced the Immune Module, the module eigengene from the gene module  
572 enriched for immune function. Both interactions involved the A/J haplotype from a region on Chr 9.  
573 This region interacted with the NOD haplotype on Chr 2 and the CAST haplotype on Chr 2 to  
574 influence the Immune Module. We first used biomaRt found all protein coding genes in the region by  
575 finding all genes in the effect size peak created by the haplotype (Durinck *et al.* 2005; 2009). We used  
576 the R package SNPTools (Gatti) to query the Sanger SNP database (Keane *et al.* 2011; Yalcin *et al.*  
577 2011) to find genes harboring variants private to the strain of interest. Thus, we found all private A/J  
578 variants in the region defined by the A/J effect on Chr 9, and all variants private to NOD and CAST on  
579 the Chr 2 regions defined by these haplotype effects respectively.

580  
581 Because the main effects of these regions were related to the immune module, we further filtered the  
582 genes in each region to genes annotated to the Mouse Phenotype (MP) Ontology (Smith *et al.* 2005)  
583 term “immune phenotype.” We then looked for the most probable functional interactions between  
584 the groups of genes from each chromosomal region using Integrative Multi-species Prediction (IMP)  
585 (Wong *et al.* 2015). IMP is a Bayesian network built through integration of gene expression data,  
586 protein-protein interaction data, gene ontology annotations and other data. It predicts the likelihood  
587 that pairs of genes interact functionally in multiple model organisms and humans. We used IMP to  
588 find the highest likelihood connected component that contained at least one gene from each  
589 chromosomal region participating in the epistatic interaction. We selected the gene pair with the  
590 highest likelihood of interacting functionally as our top candidate gene pair for the interaction.

591 **Figures**

| Module            | # Genes | Enriched GO Terms (Benjamini adjusted p value)                                                                       |
|-------------------|---------|----------------------------------------------------------------------------------------------------------------------|
| Metabolism Module | 1192    | Cellular macromolecular metabolic process ( $6.3 \times 10^{-17}$ )<br>Biosynthetic process ( $1.6 \times 10^{-5}$ ) |
| Redox Module      | 208     | Oxidation-reduction process ( $7.7 \times 10^{-7}$ )<br>Fatty acid metabolic process ( $5.7 \times 10^{-2}$ )        |
| Immune Module     | 186     | Immune system process ( $5.2 \times 10^{-2}$ )<br>Cell adhesion ( $7.9 \times 10^{-15}$ )                            |

592

593 Table 1. Functional enrichment for three gene expression modules found by WGCNA.

594

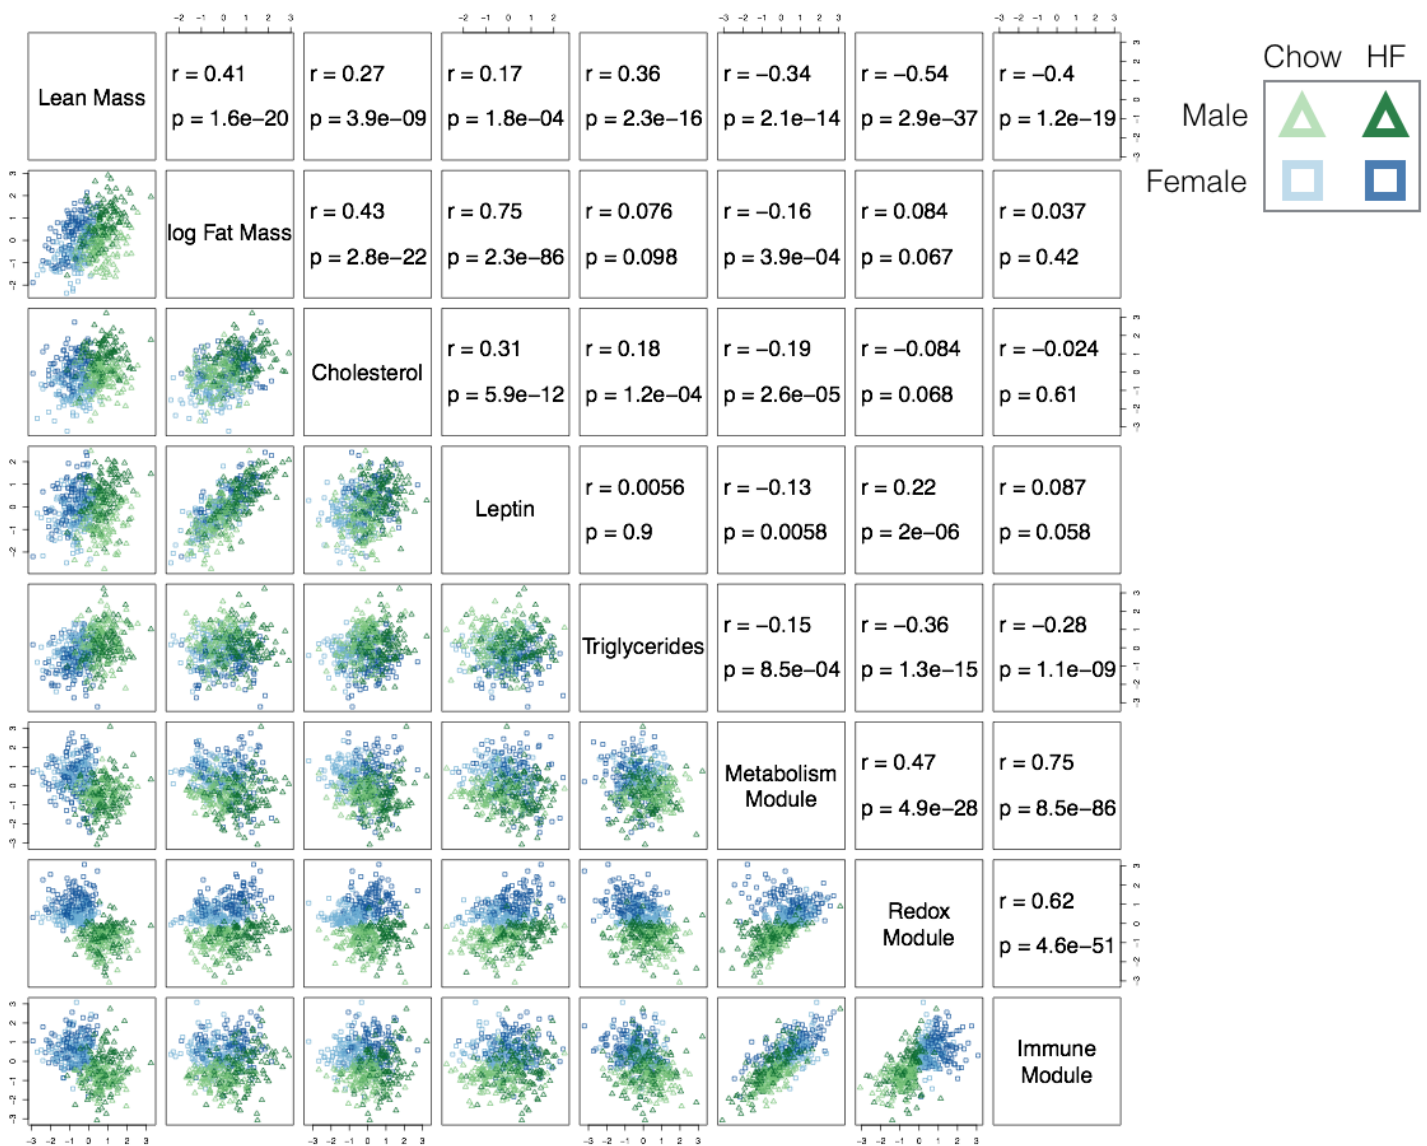

595

596  
597  
598  
599  
600

Figure 1. Correlation plots for all phenotypes used in this study. Traits tend to be modestly correlated with each other. Physiological traits and expression traits are positively correlated within their groups, but negatively correlated between groups. Males are shown as green triangles and females are blue squares. Darker shade indicates high-fat diet (HF).

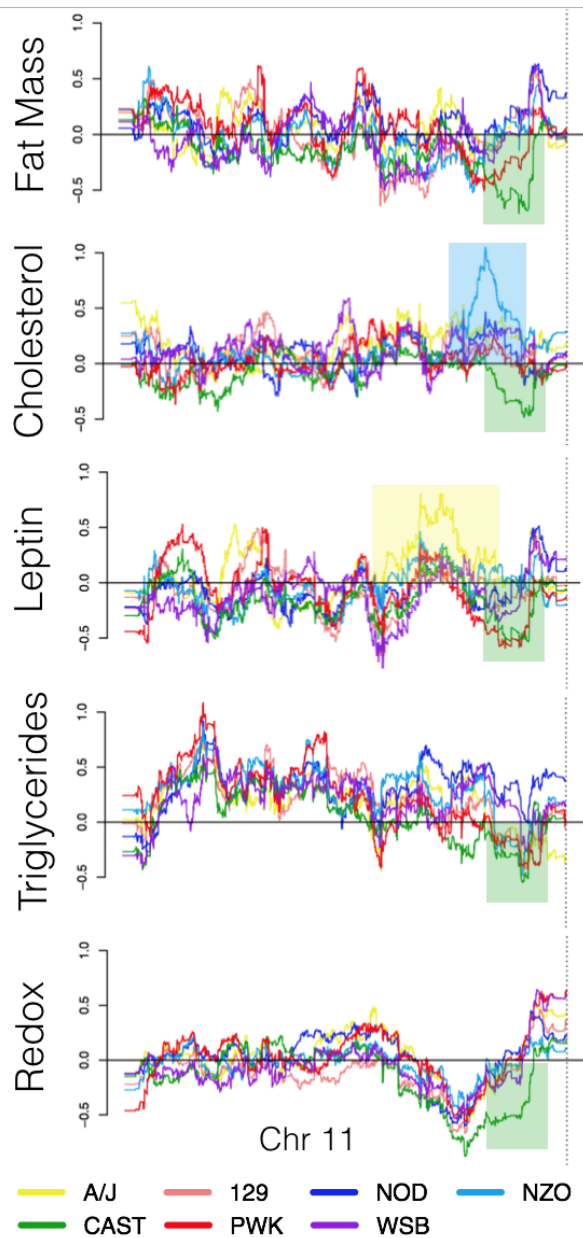

601

602

603

604

605

606

607

Figure 2. Effect sizes of each strain haplotype on Chr 11 on five traits: lean mass, log fat mass, cholesterol, triglycerides, and the metabolism expression module. Individual haplotypes have distinct effects on traits. The CAST haplotype on distal Chr 11 has pleiotropic effects on all traits (green boxes). The NZO and A/J haplotypes have individual effects on cholesterol (blue box) and leptin (yellow box) respectively.

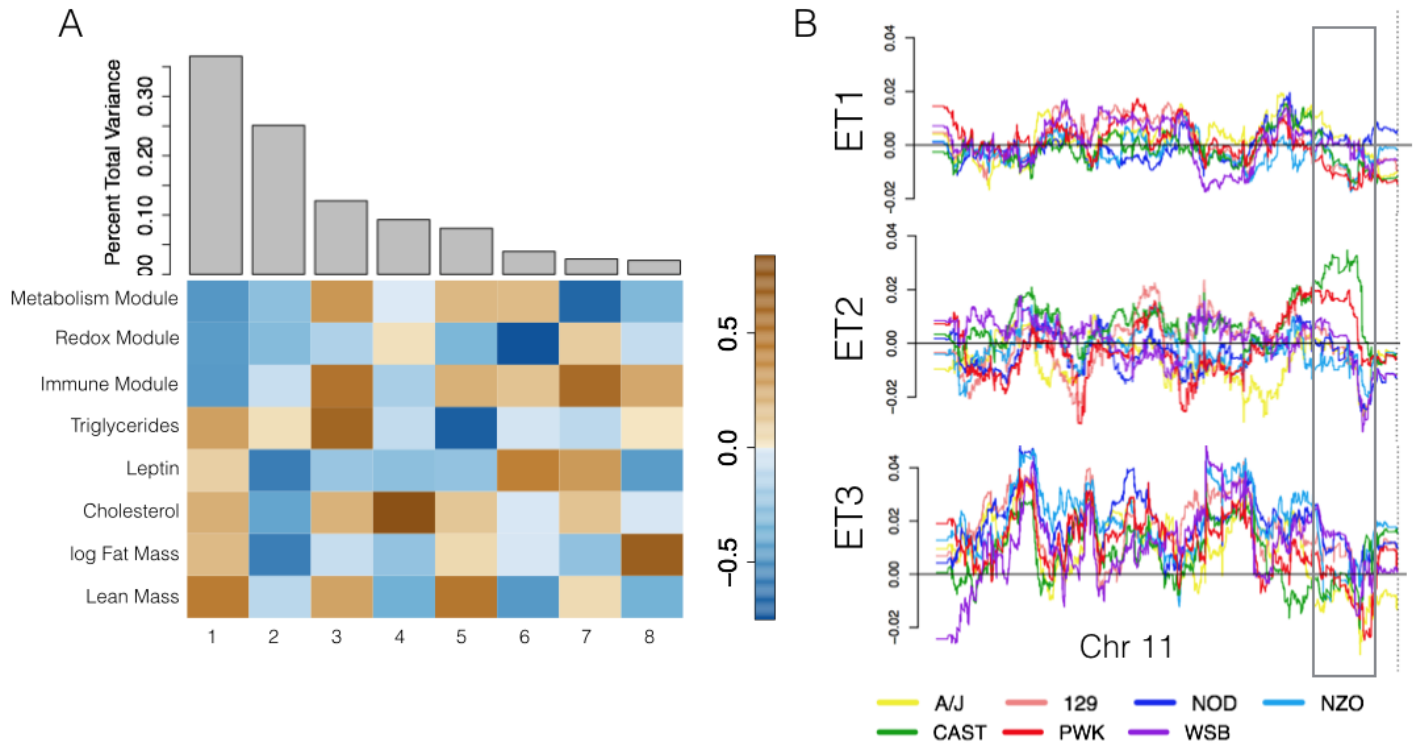

608

609 Figure 3. Eigentrait (ET) selection from decomposition of traits. A) Traits were decomposed by singular value decomposition (SVD) to  
610 orthogonal ETs. The gray bars show the proportion of the total variance captured by each ET, and the heatmap shows relative  
611 contributions of each trait to each ET. B) Haplotype effects for Chr 11 on the first three ETs.

612

613

614

615

616



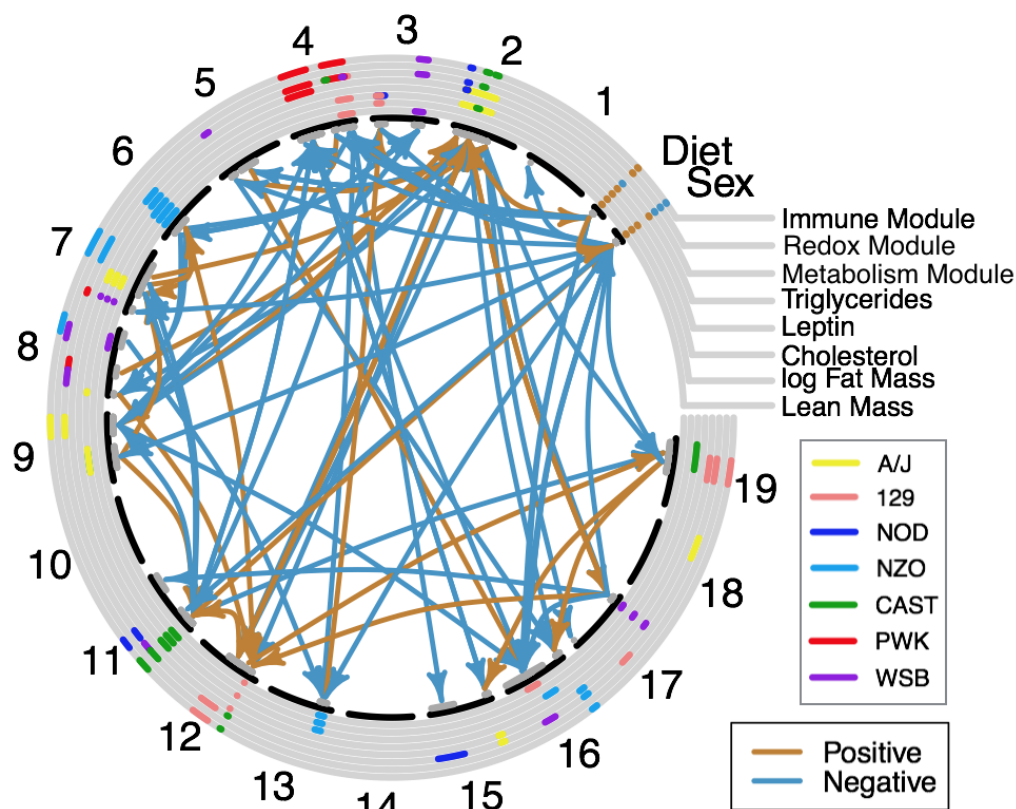

617

618 Figure 4. The final locus interaction network. Main effects are shown in gray concentric circles. Significant main effects are colored for  
 619 the haplotype that had the significant effects. Positive (brown) and negative (blue) effects are only shown for Sex and Diet. Interactions  
 620 are shown as arrows between chromosomal regions and are colored to indicate an enhancing effect (brown) or a suppressing effect  
 621 (blue).

622

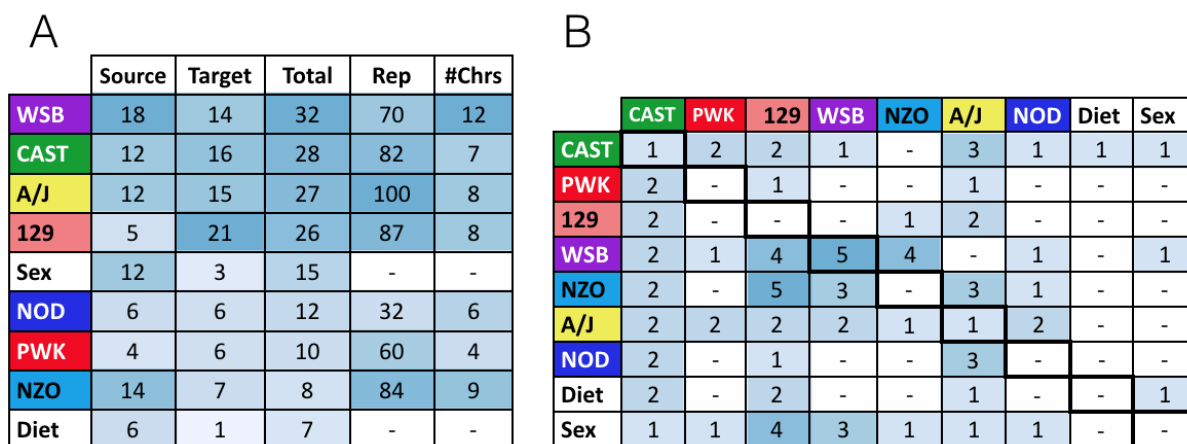

623

624 Figure 5. Tabulation of allele participation in epistatic interactions. A) The number of times each haplotype was the source of an  
 625 interaction or the target of an interaction, and the total number of interactions each haplotype participated in. Rows are sorted by total  
 626 number of interactions. The final two columns indicate how many markers were tested in the pairwise marker tests for each  
 627 haplotype, and how many chromosomes these markers were found on. Darker blue highlighting indicates higher counts. B) A detailed  
 628 count of the interactions each haplotype participated in with each other haplotype and each covariate (Sex and Diet). Darker blue  
 629 squares represent higher counts. Counts of 0 are represented by dashes for visualization purposes.

630

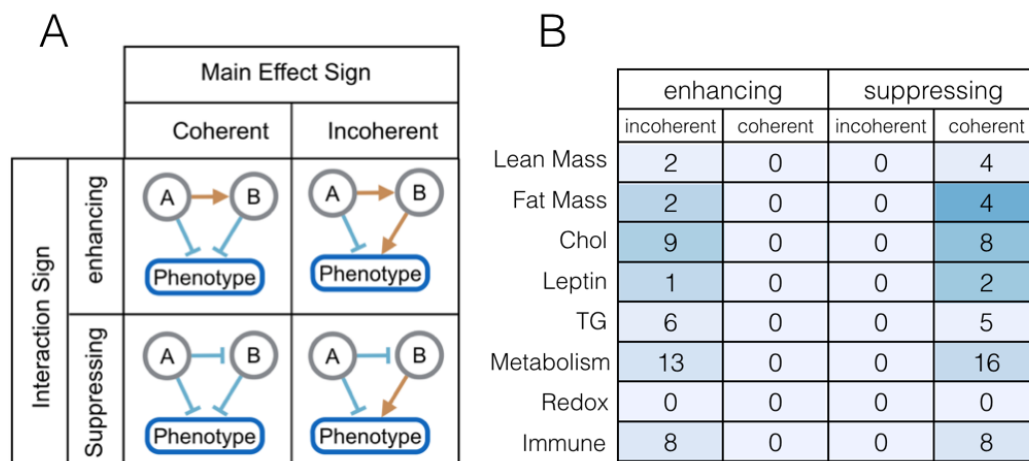

631

632

633

634

635

636

637

Figure 6. Network Motifs A) Cartoons depicting four types of network motif. Each motif consists of two markers interacting to influence one phenotype. The markers can either have the same (coherent) or different (incoherent) main effect. The interaction between them can be either enhancing or suppressing. B) Counts of each different motif type for each phenotype. Darker shades of blue indicate higher counts.

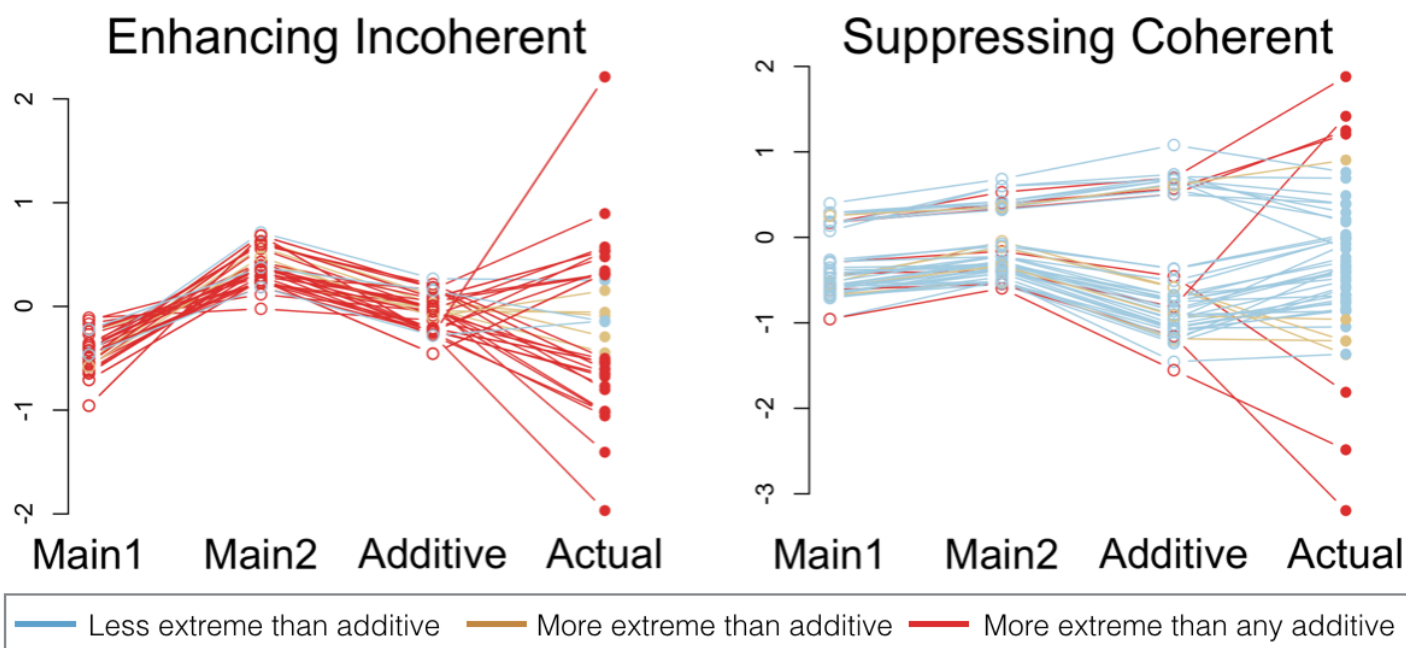

638

639

640

641

642

643

644

645

646

647

Figure 7. Phenotypic effects of enhancing-incoherent (left) and suppressing-coherent (right) network motifs. “Main1” and “Main2” show the average deviation from population mean in normalized phenotype for animals carrying the alternate allele at marker 1 and marker 2 in the motif respectively. Marker 1 and marker 2 are sorted such that marker 1 always has the smaller (more negative) effect. “Additive” shows the predicted additive effect given the Main1 and Main2 effects. “Actual” shows the actual deviation from the population mean of animals carrying the alternate allele at both marker 1 and marker 2 in the motifs. Lines are drawn to connect dots from individual motifs. Blue lines indicate motifs that bring phenotypes closer to the population mean than predicted by the additive model. Brown lines indicate motifs that drive the phenotype farther from the population mean than predicted by the additive model. Red lines indicate a subset of motifs that create more extreme phenotypes than predicted by any additive model.

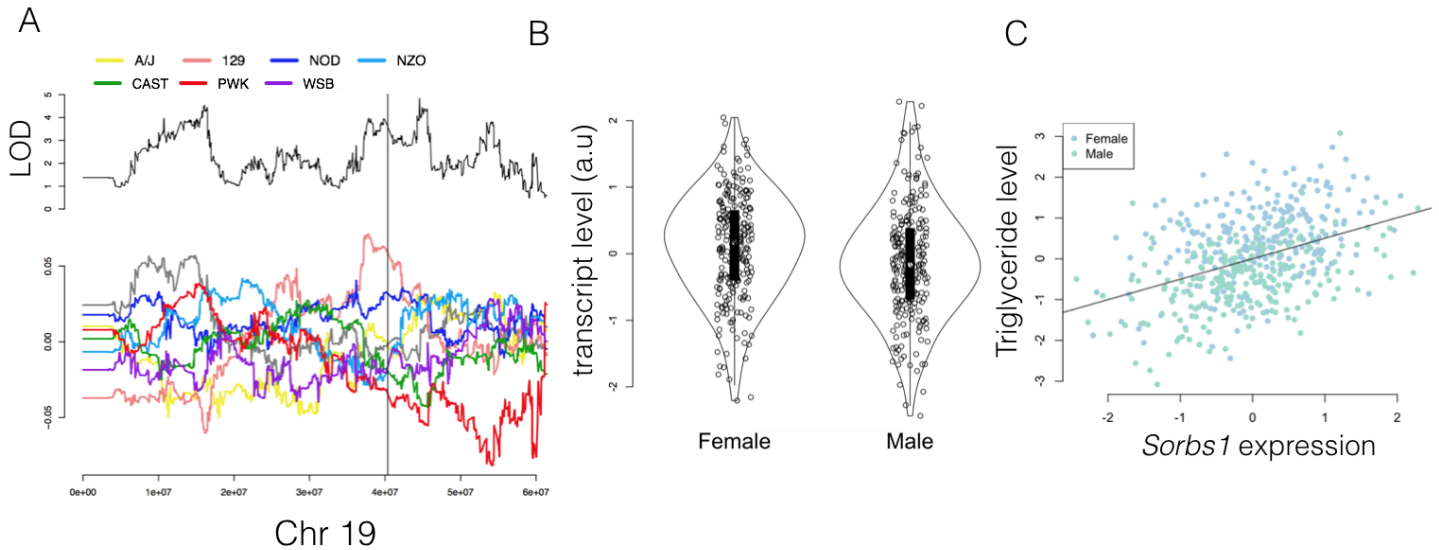

648

649 Figure 8. Evidence supporting a role of the 129 allele of *Sorbs1* increasing triglyceride levels through increased transcription. A) LOD  
 650 score (top) and haplotype coefficients (bottom) for expression of *Sorbs1*. The vertical black line marks the position of *Sorbs1* in the  
 651 genome on Chr 19. B) Expression of *Sorbs1* in male and female DO mice (a.u. = arbitrary units).. C) Correlation between triglyceride  
 652 levels and *Sorbs1* expression ( $r = 1.7$ ,  $p < 2 \times 10^{-16}$ ). Female mice are shown in blue, and males are shown in green.

653

654

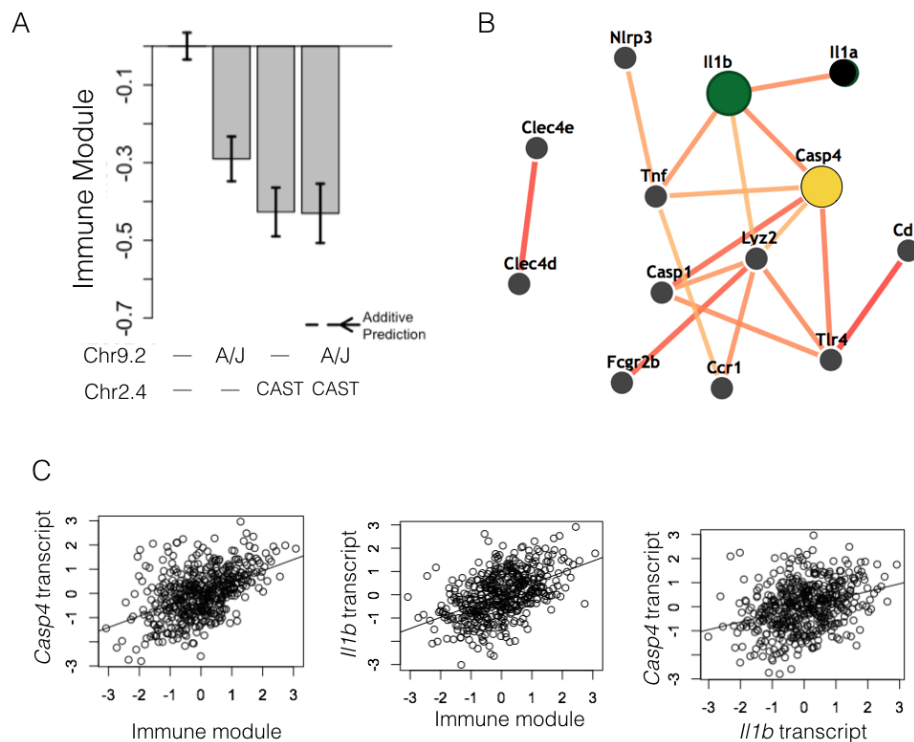

655

656

657 Figure 9. Gene prioritization in interacting loci. A) Effects of an interaction between Chr 9 locus 2 (Chr 9.2) and Chr 2 locus 2 (Chr 2.2).  
 658 The A/J haplotype on Chr 9.2 and the CAST haplotype on Chr 2.2 have individual negative effects on the Immune Module. Together,  
 659 they have the same effect as the CAST allele on Chr 2.2, indicating a redundant interaction. Error bars show standard error. B) The  
 660 transcripts of *Casp4*, on Chr 9, and *Il1b*, on Chr 2, are both correlated with the Immune Module. The transcripts are also correlated with  
 661 each other. C) The functional connections between *Casp4* and *Il1b* from the IMP network. The two genes are predicted to interact  
 662 functionally with high confidence.

663

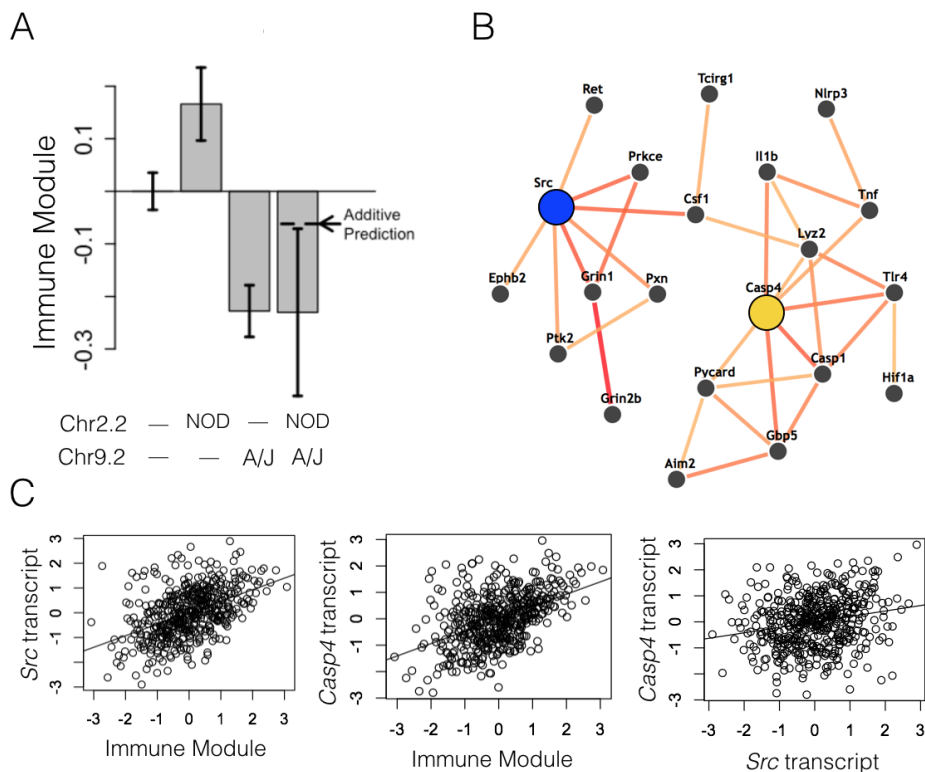

664

665 Figure 10. Gene prioritization in interacting loci. A) Effects of an interaction between Chr 9 locus 2 (Chr 9.2) and Chr 2 locus 2 (Chr 2.4).  
666 The A/J haplotype on Chr 9.2 has a negative effect on the Immune Module and the NOD haplotype on Chr 2.4 has a positive effect on the  
667 Immune Module. Together, they have an effect similar to that of the A/J allele on Chr 9.2. Error bars show standard error. B) The  
668 transcripts of *Casp4*, on Chr 9, and *Src*, on Chr 2, are both correlated with the Immune Module. The transcripts are also correlated with  
669 each other. C) Functional connections between *Src* and *Casp4* from the IMP network. The two genes are predicted to interact  
670 functionally by operating in related, but distinct pathways.

671

672

673

674

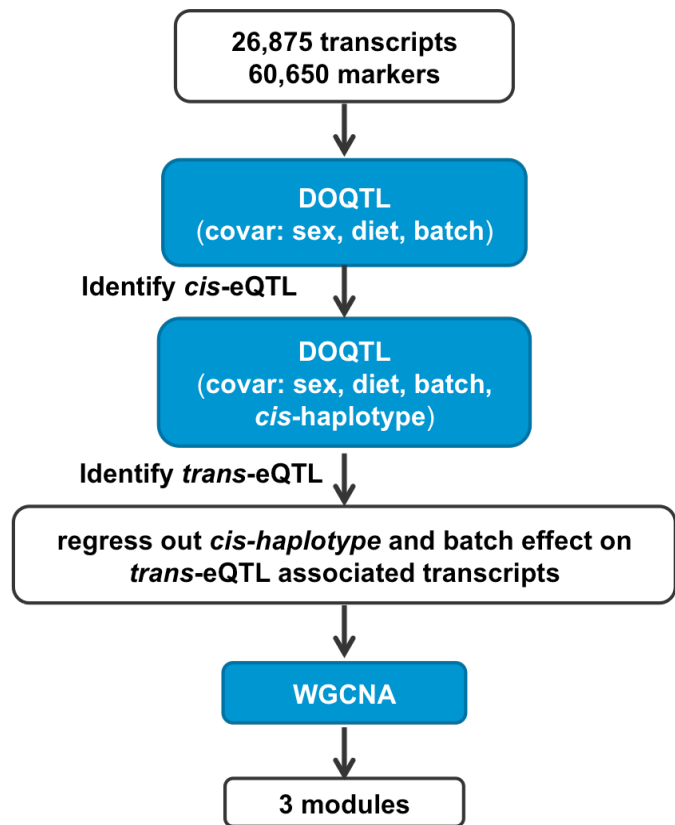

675

676 Supplementary Figure 1. Analysis pipeline to generate co-expression modules

677

678

679 Avery L., Wasserman S., 1992 Ordering gene function: the interpretation of epistasis in regulatory  
680 hierarchies. *Trends Genet.* **8**: 312–316.

681 Bogue M. A., Churchill G. A., Chesler E. J., 2015 Collaborative Cross and Diversity Outbred data  
682 resources in the Mouse Phenome Database. *Mamm Genome* **26**: 511–520.

683 Carter G. W., 2013 Inferring gene function and network organization in *Drosophila* signaling by  
684 combined analysis of pleiotropy and epistasis. *G3 (Bethesda)* **3**: 807–814.

685 Carter G. W., Hays M., Sherman A., Galitski T., 2012 Use of pleiotropy to model genetic interactions in  
686 a population. *PLoS Genet.* **8**: e1003010.

687 Chesler E. J., Gatti D. M., Morgan A. P., Strobel M., Trepanier L., Oberbeck D., McWeeney S., Hitzemann  
688 R., Ferris M., McMullan R., Clayshultle A., Bell T. A., de Villena F. P.-M., Churchill G. A., 2016  
689 Diversity Outbred Mice at 21: Maintaining Allelic Variation in the Face of Selection. *G3 (Bethesda)*  
690 **6**: 3893–3902.

691 Chick J. M., Munger S. C., Simecek P., Huttlin E. L., Choi K., Gatti D. M., Raghupathy N., Svenson K. L.,  
692 Churchill G. A., Gygi S. P., 2016 Defining the consequences of genetic variation on a proteome-  
693 wide scale. *Nature* **534**: 500–505.

694 Csardi G., Nepusz T., 2006 The igraph software package for complex network research. *InterJournal*  
695 **Complex Systems**: 1695.

696 Durinck S., Moreau Y., Kasprzyk A., Davis S., De Moor B., Brazma A., Huber W., 2005 BioMart and  
697 Bioconductor: a powerful link between biological databases and microarray data analysis.

- 698        Bioinformatics **21**: 3439–3440.
- 699        Durinck S., Spellman P. T., Birney E., Huber W., 2009 Mapping identifiers for the integration of  
700        genomic datasets with the R/Bioconductor package biomaRt. *Nat Protoc* **4**: 1184–1191.
- 701        Forbes G. B., 1987 Lean Body Mass-Body Fat Interrelationships in Humans. *Nutrition Reviews* **45**:  
702        225–231.
- 703        Gatti D. M., SNPtools. 2013, <https://CRAN.R-project.org/package=SNPtools>.
- 704        Gatti, Daniel M., et al. "Quantitative trait locus mapping methods for diversity outbred mice." *G3: Genes/ Genomes/ Genetics* 4.9 (2014): 1623-1633.  
705
- 706        Gatti D. M., Svenson K. L., Shabalín A., Wu L.-Y., Valdar W., Simecek P., Goodwin N., Cheng R., Pomp D.,  
707        Palmer A., Chesler E. J., Broman K. W., Churchill G. A., 2014b Quantitative trait locus mapping  
708        methods for diversity outbred mice. *G3 (Bethesda)* **4**: 1623–1633.
- 709        Ghazalpour A., Doss S., Bin Zhang, Wang S., Plaisier C., Castellanos R., Brozell A., Schadt E. E., Drake T.  
710        A., Luskis A. J., Horvath S., 2006 Integrating Genetic and Network Analysis to Characterize Genes  
711        Related to Mouse Weight. *PLoS Genet.* **2**: e130.
- 712        Greene C. S., Penrod N. M., Williams S. M., Moore J. H., 2009 Failure to replicate a genetic association  
713        may provide important clues about genetic architecture. (TIA Sorensen, Ed.). *PLoS ONE* **4**: e5639.
- 714        Horn T., Sandmann T., Fischer B., Axelsson E., Huber W., Boutros M., 2011 Mapping of signaling  
715        networks through synthetic genetic interaction analysis by RNAi. *Nat. Methods* **8**: 341–346.
- 716        Huang D. W., Sherman B. T., Lempicki R. A., 2009a Systematic and integrative analysis of large gene  
717        lists using DAVID bioinformatics resources. *Nat Protoc* **4**: 44–57.
- 718        Huang D. W., Sherman B. T., Lempicki R. A., 2009b Bioinformatics enrichment tools: paths toward the  
719        comprehensive functional analysis of large gene lists. *Nucleic Acids Res.* **37**: 1–13.
- 720        Huang W., Mackay T. F. C., 2016 The Genetic Architecture of Quantitative Traits Cannot Be Inferred  
721        from Variance Component Analysis. (X Zhu, Ed.). *PLoS Genet.* **12**: e1006421.
- 722        Hwang L.-L., Wang C.-H., Li T.-L., Chang S.-D., Lin L.-C., Chen C.-P., Chen C.-T., Liang K.-C., Ho I.-K., Yang  
723        W.-S., Chiou L.-C., 2010 Sex differences in high-fat diet-induced obesity, metabolic alterations and  
724        learning, and synaptic plasticity deficits in mice. *Obesity (Silver Spring)* **18**: 463–469.
- 725        Johnston A., Gudjonsson J. E., Aphale A., Guzman A. M., Stoll S. W., Elder J. T., 2011 EGFR and IL-1  
726        Signaling Synergistically Promote Keratinocyte Antimicrobial Defenses in a Differentiation-  
727        Dependent Manner. *Journal of Investigative Dermatology* **131**: 329–337.
- 728        Kang H. M., Zaitlen N. A., Wade C. M., Kirby A., Heckerman D., Daly M. J., Eskin E., 2008 Efficient  
729        control of population structure in model organism association mapping. *Genetics* **178**: 1709–  
730        1723.
- 731        Keane T. M., Goodstadt L., Danecek P., White M. A., Wong K., Yalcin B., Heger A., Agam A., Slater G.,  
732        Goodson M., Furlotte N. A., Eskin E., Nellåker C., Whitley H., Cleak J., Janowitz D., Hernandez-  
733        Pliego P., Edwards A., Belgard T. G., Oliver P. L., McIntyre R. E., Bhomra A., Nicod J., Gan X., Yuan  
734        W., van der Weyden L., Steward C. A., Bala S., Stalker J., Mott R., Durbin R., Jackson I. J., Czechanski  
735        A., Guerra-Assunção J. A., Donahue L. R., Reinholdt L. G., Payseur B. A., Ponting C. P., Birney E.,

- 736 Flint J., Adams D. J., 2011 Mouse genomic variation and its effect on phenotypes and gene  
737 regulation. *Nature* **477**: 289–294.
- 738 Langfelder P., Horvath S., 2008 WGCNA: an R package for weighted correlation network analysis.  
739 *BMC Bioinformatics* **9**: 559.
- 740 Lehner B., 2011 Molecular mechanisms of epistasis within and between genes. *Trends Genet.* **27**:  
741 323–331.
- 742 Lesniewski L. A., Hosch S. E., Neels J. G., de Luca C., Pashmforoush M., Lumeng C. N., Chiang S.-H.,  
743 Scadeng M., Saltiel A. R., Olefsky J. M., 2007 Bone marrow-specific Cap gene deletion  
744 protects against high-fat diet-induced insulin resistance. *Nat. Med.* **13**: 455–462.
- 745 Logan R. W., Robledo R. F., Recla J. M., Philip V. M., Bubier J. A., Jay J. J., Harwood C., Wilcox T., Gatti D.  
746 M., Bult C. J., Churchill G. A., Chesler E. J., 2013 High-precision genetic mapping of behavioral traits  
747 in the diversity outbred mouse population. *Genes, Brain and Behavior* **12**: 424–437.
- 748 Moore J. H., Williams S. M., 2009 Epistasis and Its Implications for Personal Genetics. *The American*  
749 *Journal of Human Genetics* **85**: 309–320.
- 750 Motenko H., Neuhauser S. B., O'Keefe M., Richardson J. E., 2015 MouseMine: a new data warehouse  
751 for MGI. *Mamm Genome* **26**: 325–330.
- 752 Munger S. C., Raghupathy N., Choi K., Simons A. K., 2014 RNA-Seq alignment to individualized  
753 genomes improves transcript abundance estimates in multiparent populations. ....
- 754 Nishikawa S., Yasoshima A., Doi K., Nakayama H., Uetsuka K., 2007 Involvement of sex, strain and age  
755 factors in high fat diet-induced obesity in C57BL/6J and BALB/cA mice. *Exp. Anim.* **56**: 263–272.
- 756 Ober C., Loisel D. A., Gilad Y., 2008 Sex-specific genetic architecture of human disease. *Nature*  
757 *Publishing Group* **9**: 911–922.
- 758 Ordovas J. M., 2006 Genetic interactions with diet influence the risk of cardiovascular disease. *Am. J.*  
759 *Clin. Nutr.* **83**: 443S–446S.
- 760 Philip V. M., Sokoloff G., Ackert-Bicknell C. L., Striz M., Branstetter L., Beckmann M. A., Spence J. S.,  
761 Jackson B. L., Galloway L. D., Barker P., Wymore A. M., Hunsicker P. R., Durtschi D. C., Shaw G. S.,  
762 Shinpock S., Manly K. F., Miller D. R., Donohue K. D., Culiati C. T., Churchill G. A., Lariviere W. R.,  
763 Palmer A. A., O'Hara B. F., Voy B. H., Chesler E. J., 2011 Genetic analysis in the Collaborative Cross  
764 breeding population. *Genome Research* **21**: 1223–1238.
- 765 Philip V. M., Tyler A. L., Carter G. W., 2014 Dissection of complex gene expression using the combined  
766 analysis of pleiotropy and epistasis. *Pac Symp Biocomput*: 200–211.
- 767 Pierce B. L., Tong L., Chen L. S., Rahaman R., Argos M., Jasmine F., Roy S., Paul-Brutus R., Westra H.-J.,  
768 Franke L., Esko T., Zaman R., Islam T., Rahman M., Baron J. A., Kibriya M. G., Ahsan H., 2014  
769 Mediation analysis demonstrates that trans-eQTLs are often explained by cis-mediation: a  
770 genome-wide analysis among 1,800 South Asians. (JK Pritchard, Ed.). *PLoS Genet.* **10**: e1004818.
- 771 Pritchard J. K., Stephens M., Rosenberg N. A., Donnelly P., 2000 Association mapping in structured  
772 populations. *Am. J. Hum. Genet.* **67**: 170–181.
- 773 R Core Team (2016). R: A language and environment for statistical computing. R Foundation for

- 774 Statistical Computing, Vienna, Austria. URL <https://www.R-project.org/>. Avery L., Wasserman S.,  
775 1992 Ordering gene function: the interpretation of epistasis in regulatory hierarchies. *Trends*  
776 *Genet.* **8**: 312–316.
- 777 Rosenberg N. A., Pritchard J. K., Weber J. L., Cann H. M., Kidd K. K., Zhivotovsky L. A., Feldman M. W.,  
778 2002 Genetic structure of human populations. *Science* **298**: 2381–2385.
- 779 Schork N. J., 1997 Genetically Complex Cardiovascular Traits. *Hypertension* **29**: 145–149.
- 780 Simanski M., Rademacher F., Schröder L., Gläser R., Harder J., 2016 The Inflammasome and the  
781 Epidermal Growth Factor Receptor (EGFR) Are Involved in the Staphylococcus aureus-Mediated  
782 Induction of IL-1alpha and IL-1beta in Human Keratinocytes (IC Allen, Ed.). *PLoS ONE* **11**:  
783 e0147118.
- 784 Smith C. L., Goldsmith C.-A. W., Eppig J. T., 2005 The Mammalian Phenotype Ontology as a tool for  
785 annotating, analyzing and comparing phenotypic information. *Genome Biol.* **6**: R7.
- 786 Svenson K. L., Gatti D. M., Valdar W., Welsh C. E., Cheng R., Chesler E. J., Palmer A. A., McMillan L.,  
787 Churchill G. A., 2012 High-resolution genetic mapping using the Mouse Diversity outbred  
788 population. *Genetics* **190**: 437–447.
- 789 Tyler A. L., Donahue L. R., Churchill G. A., Carter G. W., 2016 Weak Epistasis Generally Stabilizes  
790 Phenotypes in a Mouse Intercross (JM Cheverud, Ed.). *PLoS Genet.* **12**: e1005805–22.
- 791 Tyler A. L., McGarr T. C., Beyer B. J., Frankel W. N., Carter G. W., 2014 A Genetic Interaction Network  
792 Model of a Complex Neurological Disease. *Genes, Brain and Behavior*.
- 793 Wang S., Miura M., Jung Y.-K., Zhu H., Li E., Yuan J., 1998 Murine Caspase-11, an ICE-Interacting  
794 Protease, Is Essential for the Activation of ICE. *Cell* **92**: 501–509.
- 795 Weiss L. A., Pan L., Abney M., Ober C., 2006 The sex-specific genetic architecture of quantitative traits  
796 in humans. *Nature Genetics* **38**: 218–222.
- 797 Wong A. K., Krishnan A., Yao V., Tadych A., Troyanskaya O. G., 2015 IMP 2.0: a multi-species  
798 functional genomics portal for integration, visualization and prediction of protein functions and  
799 networks. *Nucleic Acids Res.* **43**: W128–33.
- 800 Yalcin B., Wong K., Agam A., Goodson M., Keane T. M., Gan X., Nellåker C., Goodstadt L., Nicod J.,  
801 Bhomra A., Hernandez-Pliego P., Whitley H., Cleak J., Dutton R., Janowitz D., Mott R., Adams D. J.,  
802 Flint J., 2011 Sequence-based characterization of structural variation in the mouse genome.  
803 *Nature* **477**: 326–329.
- 804 Yang H., Wang J. R., Didion J. P., Buus R. J., Bell T. A., Welsh C. E., Bonhomme F., Yu A. H.-T., Nachman  
805 M. W., Pialek J., Tucker P., Boursot P., McMillan L., Churchill G. A., de Villena F. P.-M., 2011  
806 Subspecific origin and haplotype diversity in the laboratory mouse. *Nat. Genet.* **43**: 648–655.
- 807
